# Supplementary material for: Janus-type AT nucleosides: synthesis, solid and solution state structures
Source: Royal Society of Chemistry journal article supplement (doi:10.1039/c1ob05577a), 2011-01-01
Supplement: c1ob05577a.pdf [file c1ob05577a.pdf]

## Support information

### Janus type AT nucleosides: synthesis, solid and solution state structures

Mei-Ying Pan<sup>a</sup>, Wen Hang<sup>a</sup>, Xiao-jun Zhao<sup>a</sup>, Hang Zhao<sup>a</sup>, Peng-chi Deng<sup>b</sup>, Zhi-Hua Xing<sup>a</sup>,

Yong Qing<sup>a</sup>, Yang He<sup>a\*</sup>

<sup>a</sup>Laboratory of Ethnopharmacology, Institute for Nanobiomedical Technology and, Membrane Biology, Regenerative Medicine Research Center, West China Hospital, West China Medical School, Sichuan University, Chengu, 610041, China; <sup>b</sup>Analytical & Testing Center, Sichuan University, Chengdu, 610064, China.

#### Table of contents:

|                                                              |    |
|--------------------------------------------------------------|----|
| Figure S1: <sup>1</sup> H NMR spectrum of compound 6a.....   | 2  |
| Figure S2: <sup>13</sup> C NMR spectrum of compound 6a.....  | 3  |
| Figure S3: <sup>1</sup> H NMR spectrum of compound 1b.....   | 4  |
| Figure S4: <sup>13</sup> C NMR spectrum of compound 1b.....  | 5  |
| Figure S5: <sup>1</sup> H NMR spectrum of compound 6b.....   | 6  |
| Figure S6: <sup>13</sup> C NMR spectrum of compound 6b.....  | 7  |
| Figure S7: <sup>1</sup> H NMR spectrum of compound 1b.....   | 8  |
| Figure S8: <sup>13</sup> C NMR spectrum of compound 1b.....  | 9  |
| Figure S9: <sup>1</sup> H NMR spectrum of compound 6c.....   | 10 |
| Figure S10: <sup>13</sup> C NMR spectrum of compound 6c..... | 11 |
| Figure S11: <sup>1</sup> H NMR spectrum of compound 1c.....  | 12 |
| Figure S12: <sup>13</sup> C NMR spectrum of compound 1c..... | 13 |
| Figure S13: <sup>1</sup> H NMR spectrum of compound 6d ..... | 14 |
| Figure S14: <sup>13</sup> C NMR spectrum of compound 6d..... | 15 |
| Figure S15: <sup>1</sup> H NMR spectrum of compound 1d ..... | 16 |
| Figure S16: <sup>13</sup> C NMR spectrum of compound 1d..... | 17 |
| Figure S17: <sup>1</sup> H NMR spectrum of compound 7c.....  | 18 |
| Figure S18: <sup>13</sup> C NMR spectrum of compound 7c..... | 19 |
| Figure S19: <sup>1</sup> H NMR spectrum of compound 7d.....  | 20 |
| Figure S20: <sup>13</sup> C NMR spectrum of compound 7d..... | 21 |

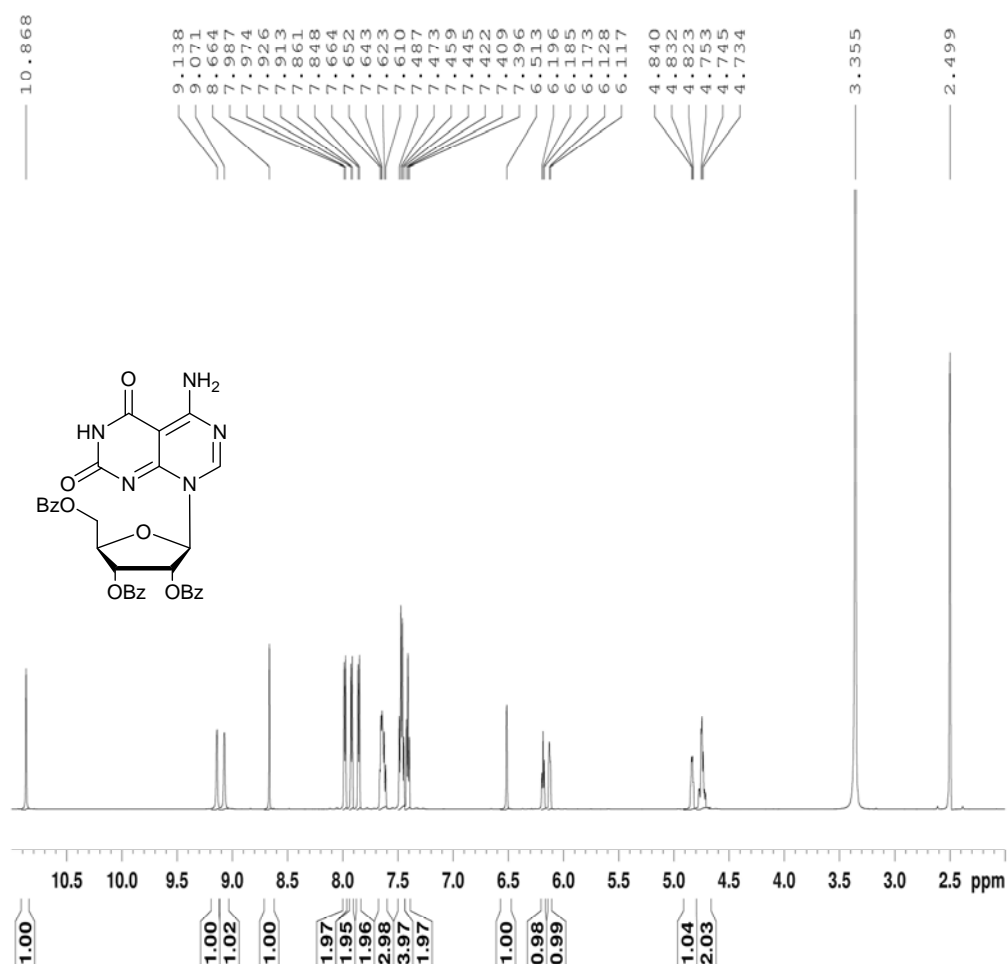

Figure S1: <sup>1</sup>H NMR spectrum of compound 6a

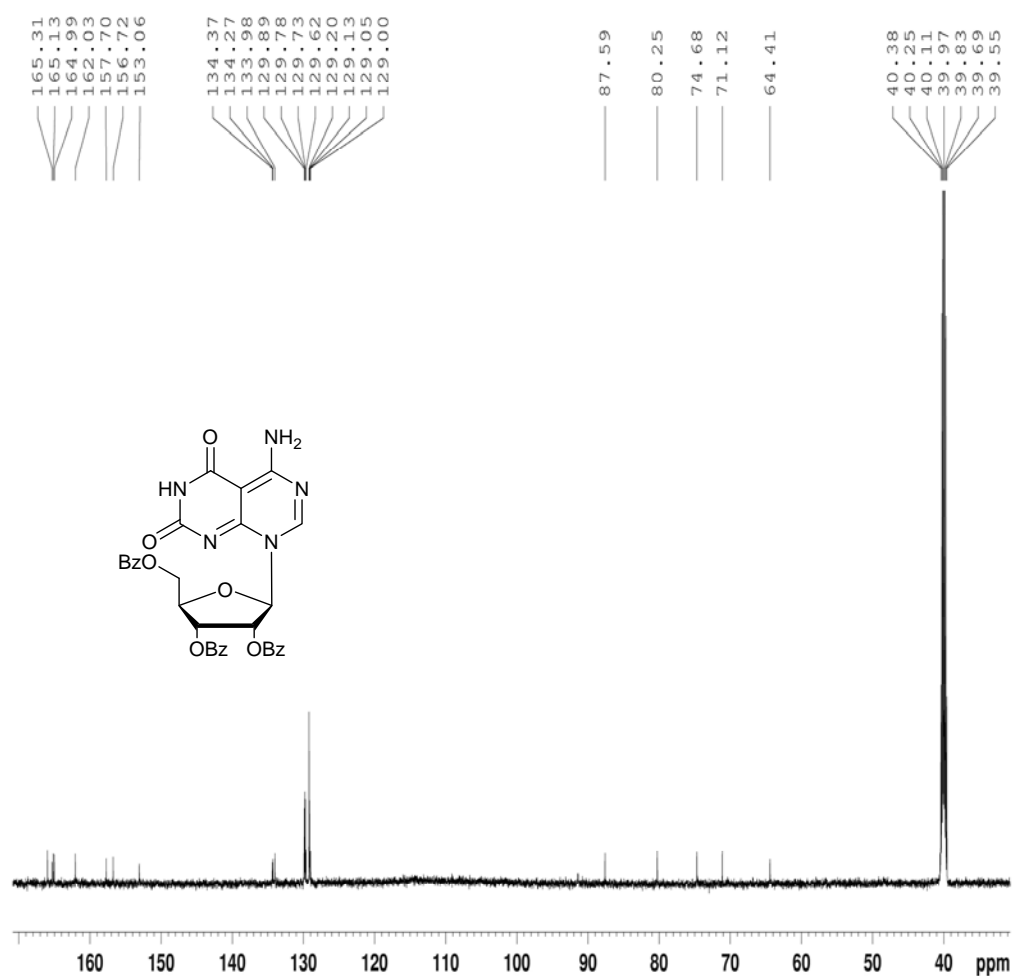

Figure S2: <sup>13</sup>C NMR spectrum of compound 6a

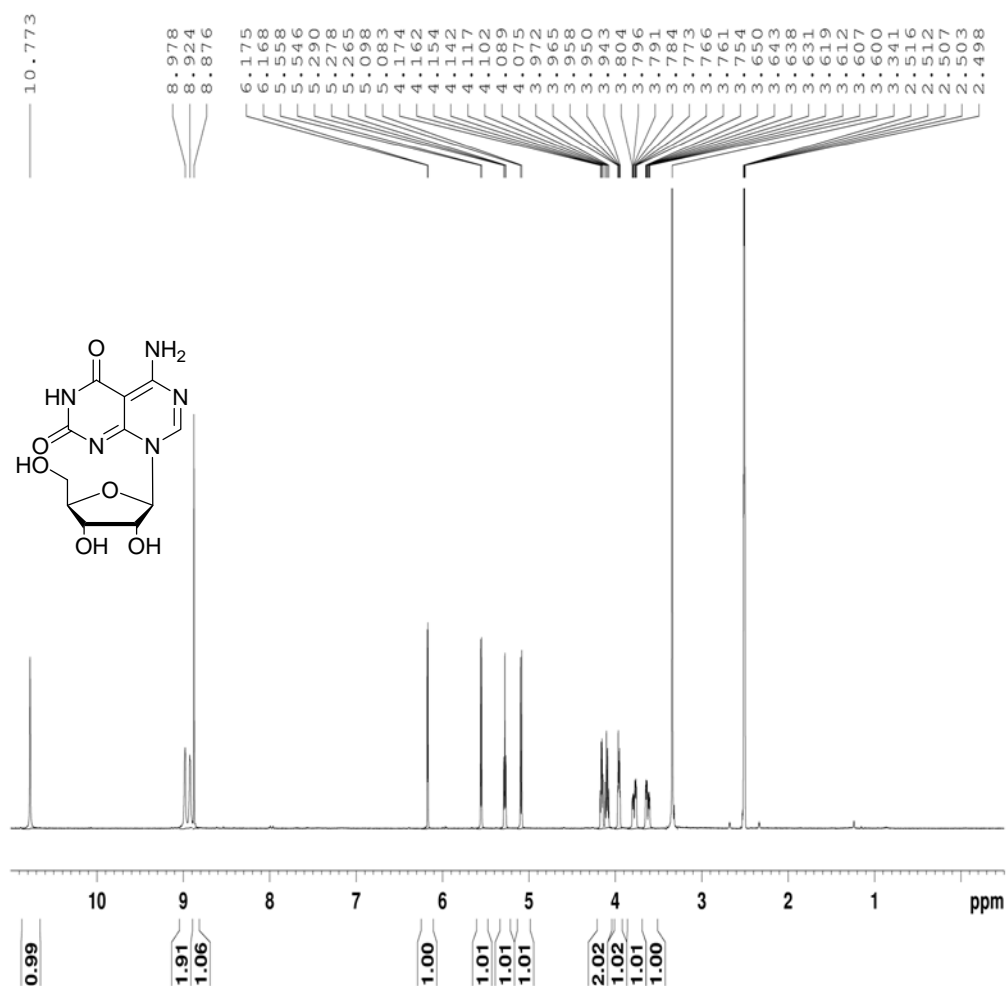

Figure S3:  $^1\text{H}$  NMR spectrum of compound 1a

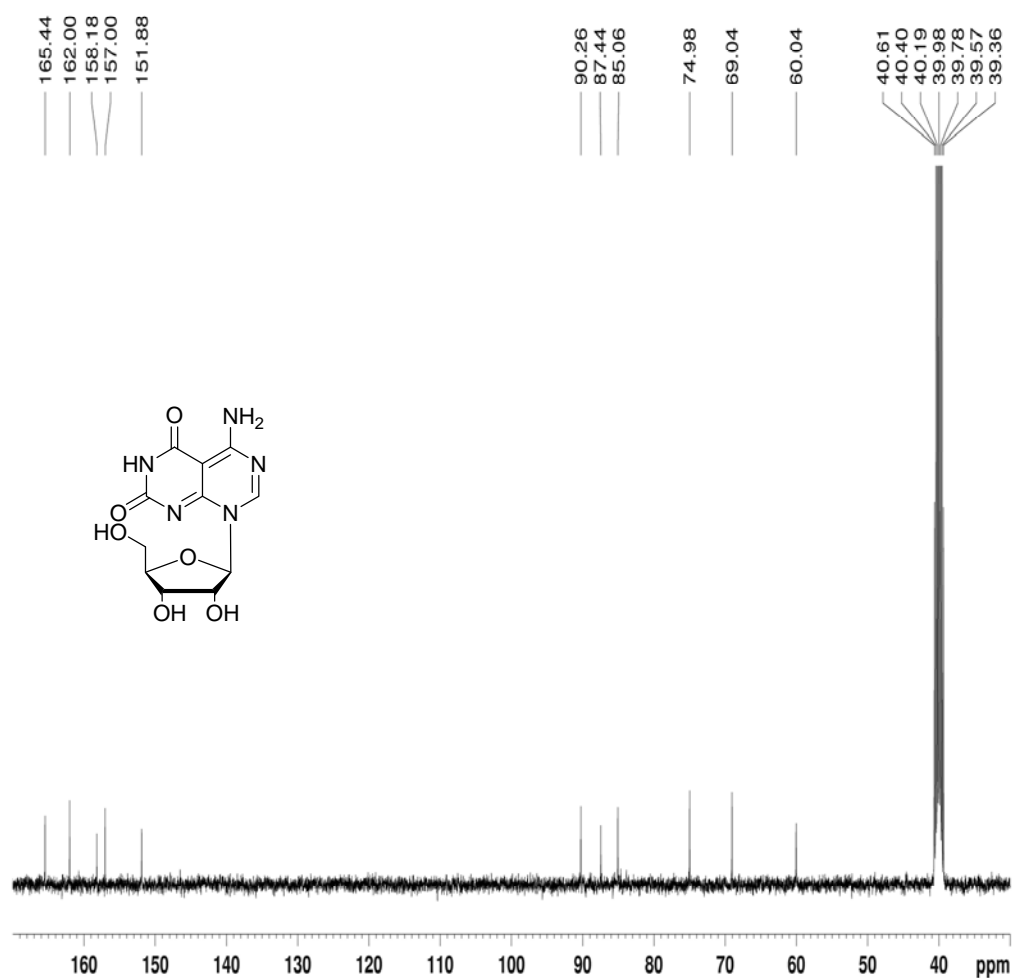

**Figure S4:** <sup>13</sup>C NMR spectrum of compound 1a

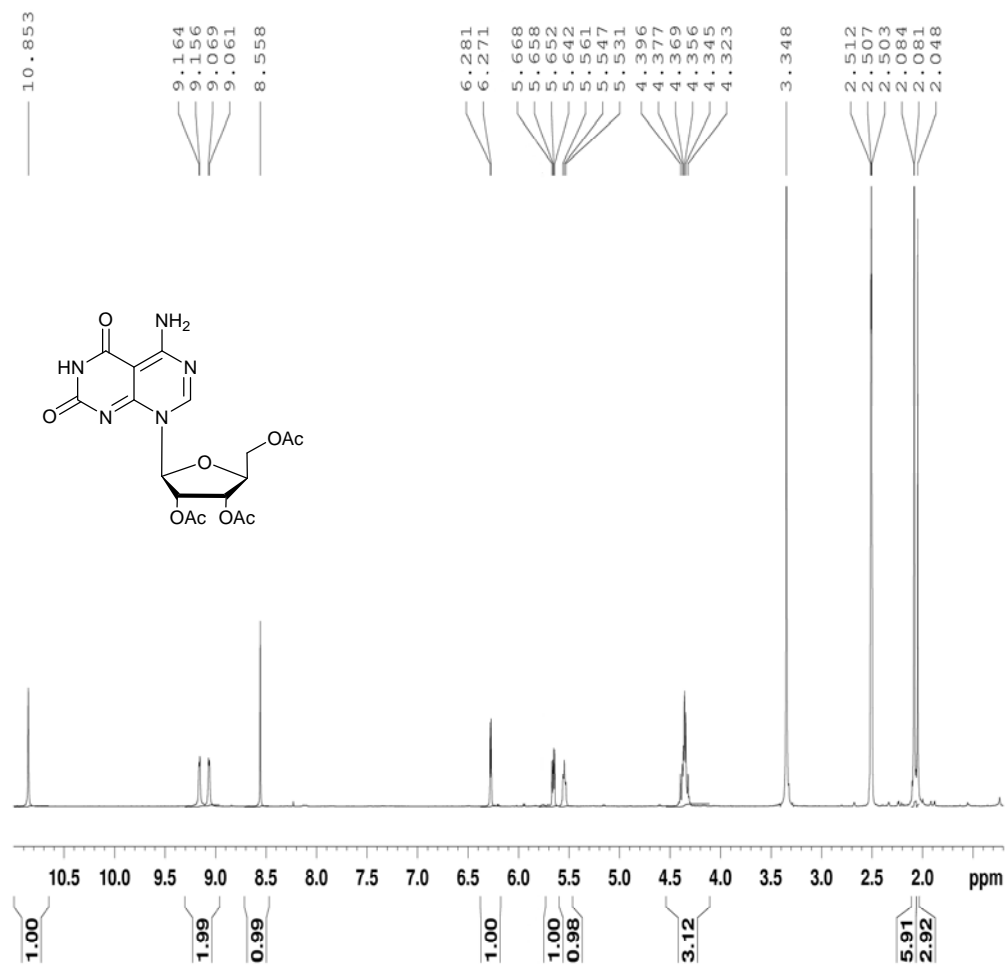

Figure S5:  $^1\text{H}$  NMR spectrum of compound 6b

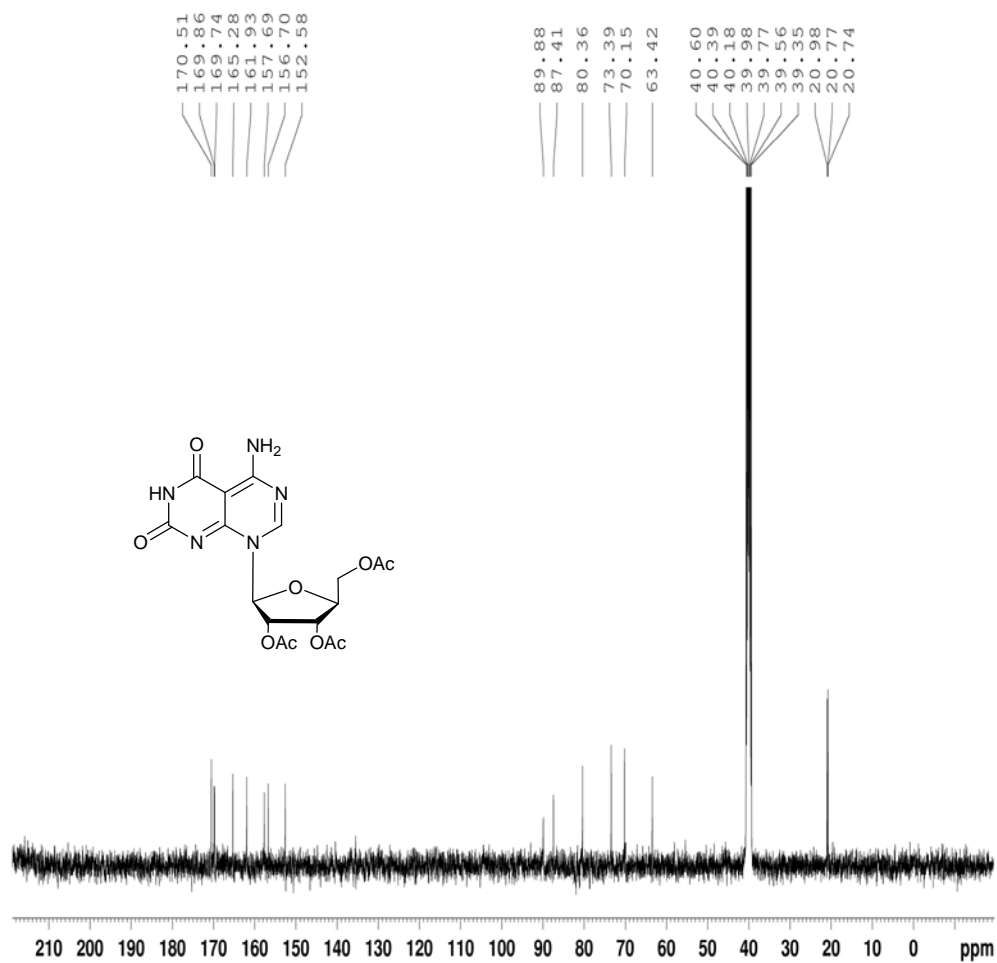

Figure S6: <sup>13</sup>C NMR spectrum of compound 6b

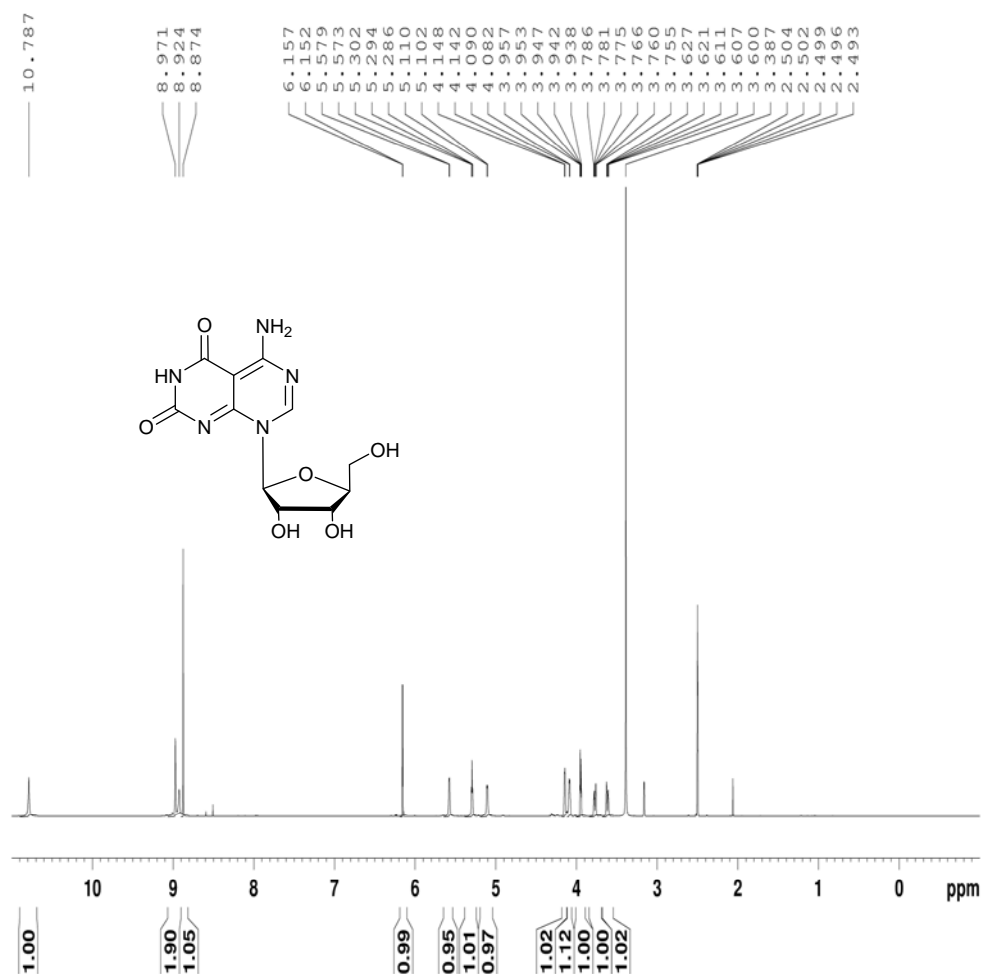

Figure S7: <sup>1</sup>H NMR spectrum of compound 1b

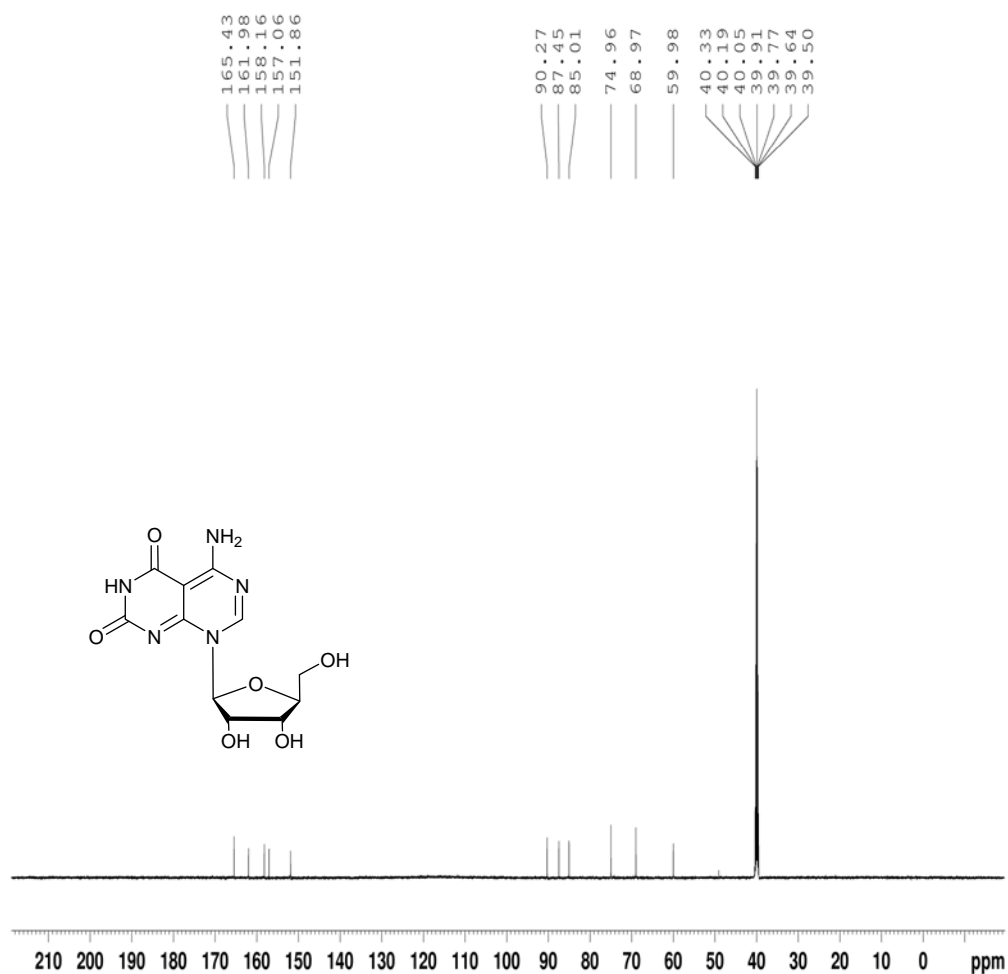

**Figure S8:** <sup>13</sup>C NMR spectrum of compound 1b

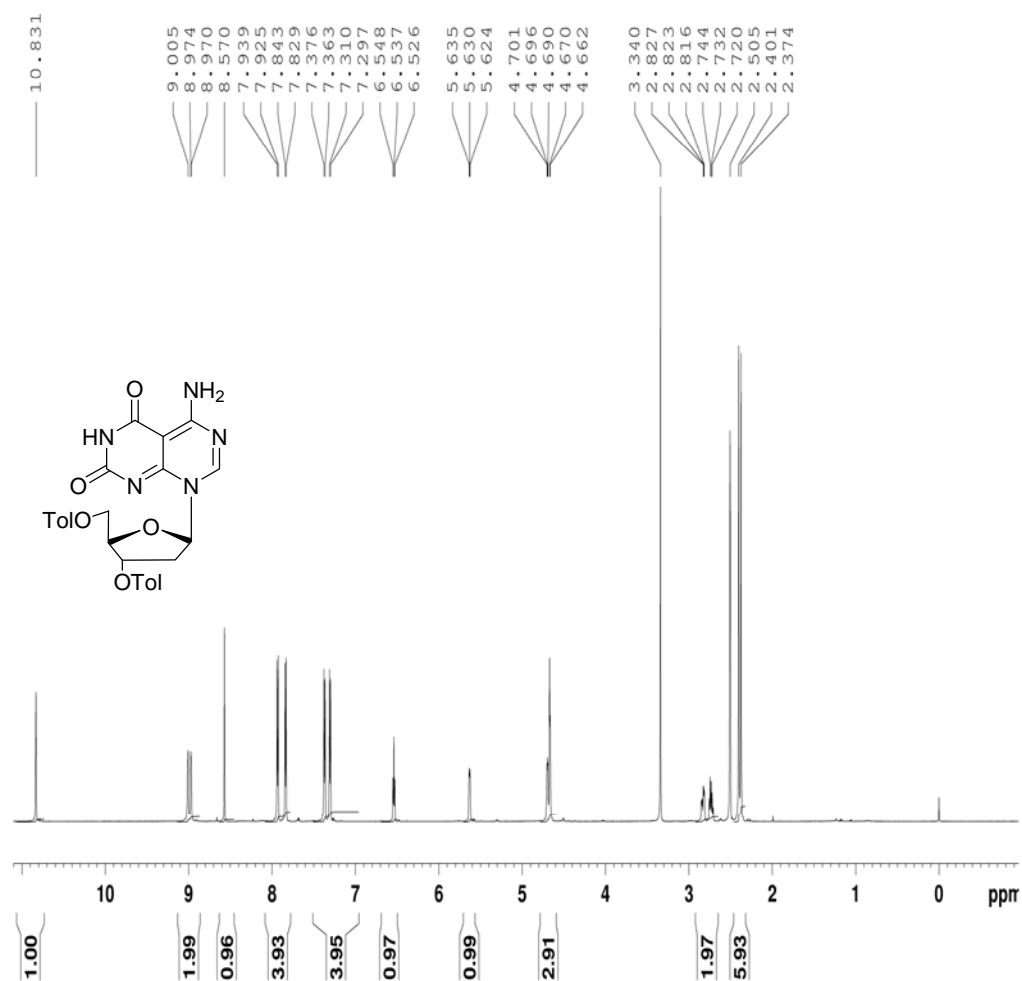

Figure S9: <sup>1</sup>H NMR spectrum of compound 6c

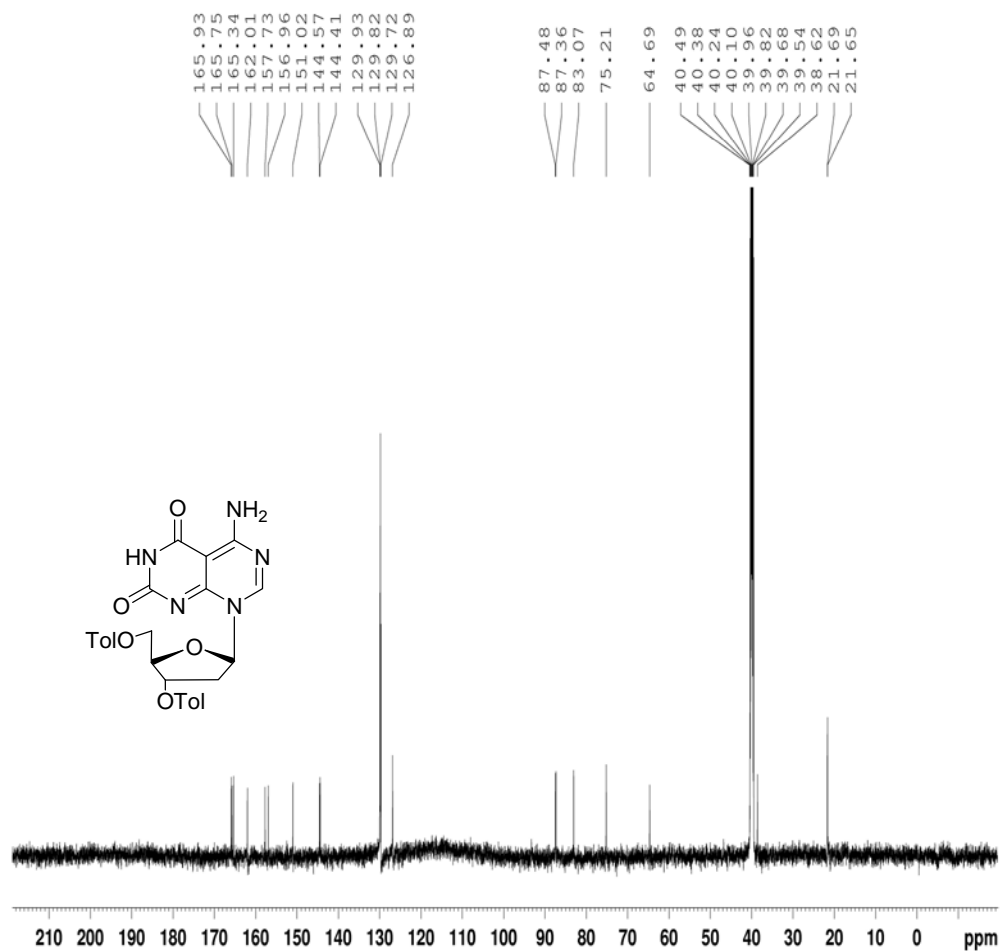

**Figure S10:**  $^{13}\text{C}$  NMR spectrum of compound 6c

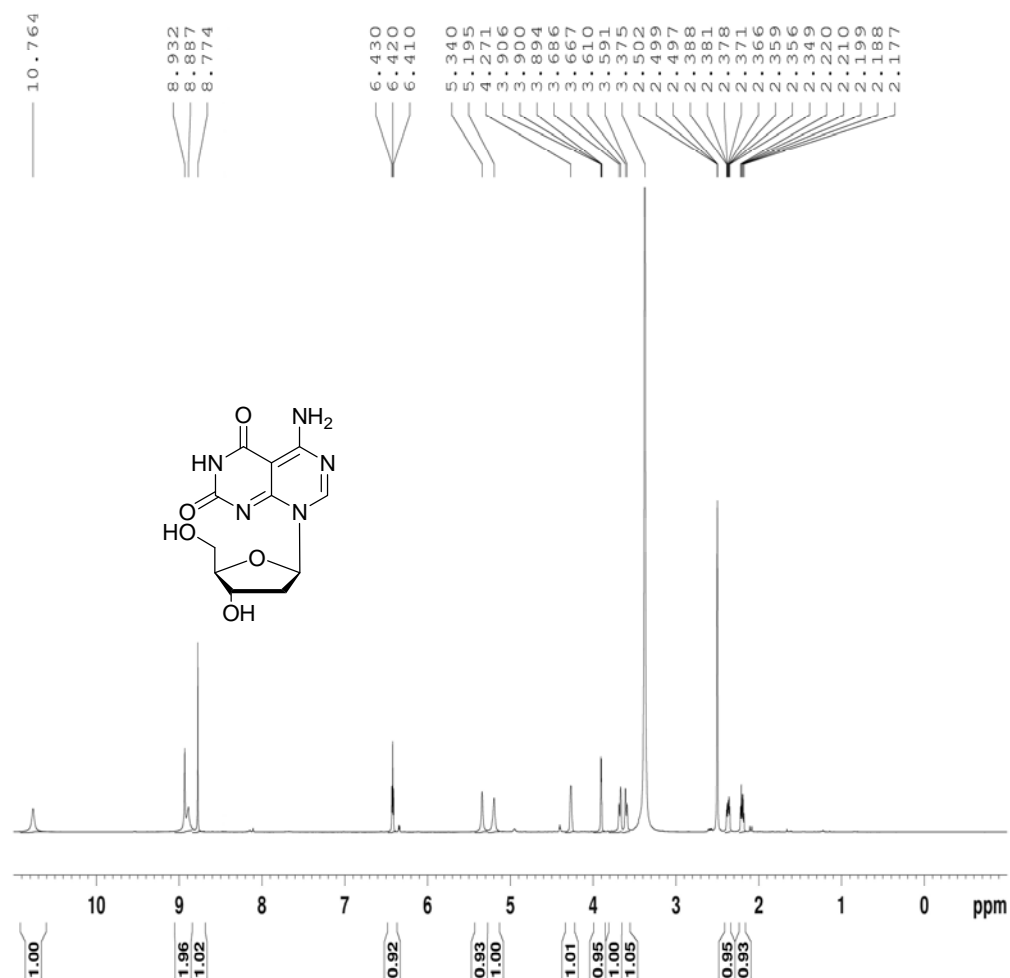

Figure S11: <sup>1</sup>H NMR spectrum of compound 1c

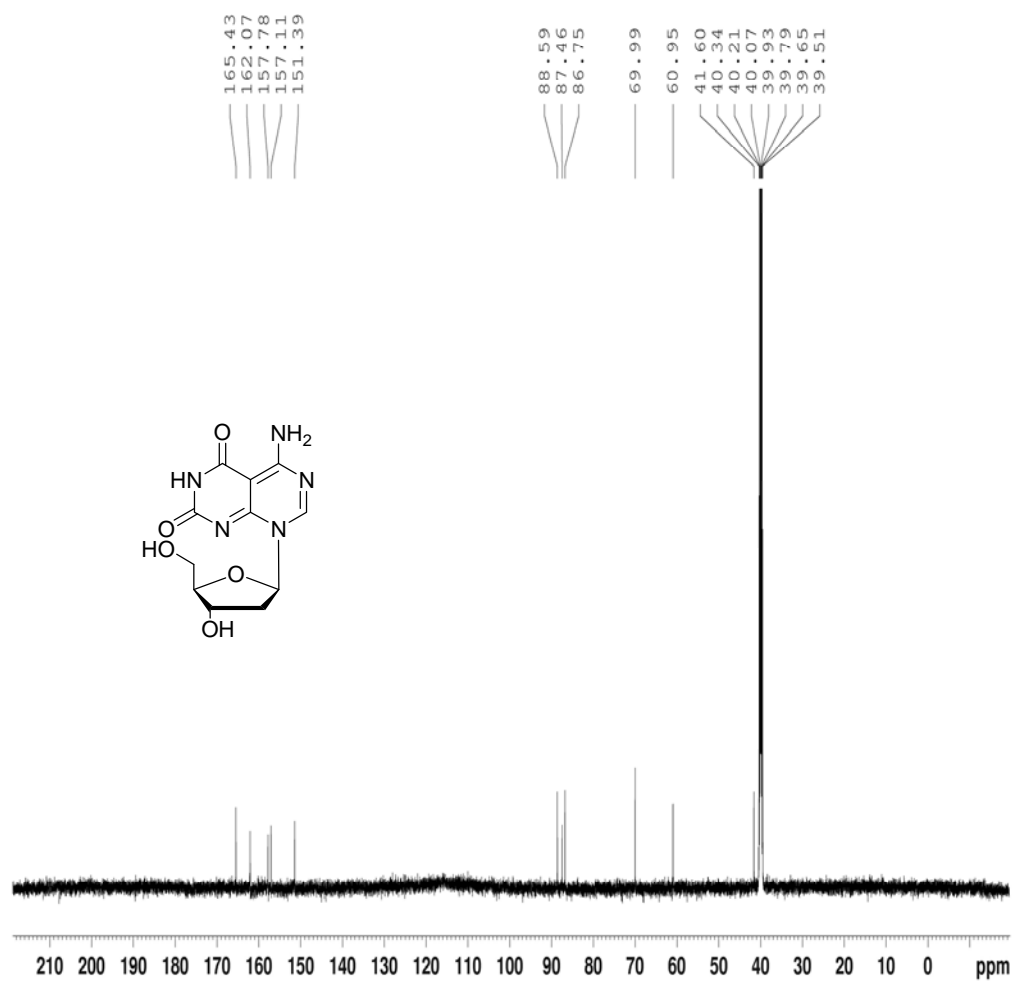

Figure S12: <sup>13</sup>C NMR spectrum of compound 1c

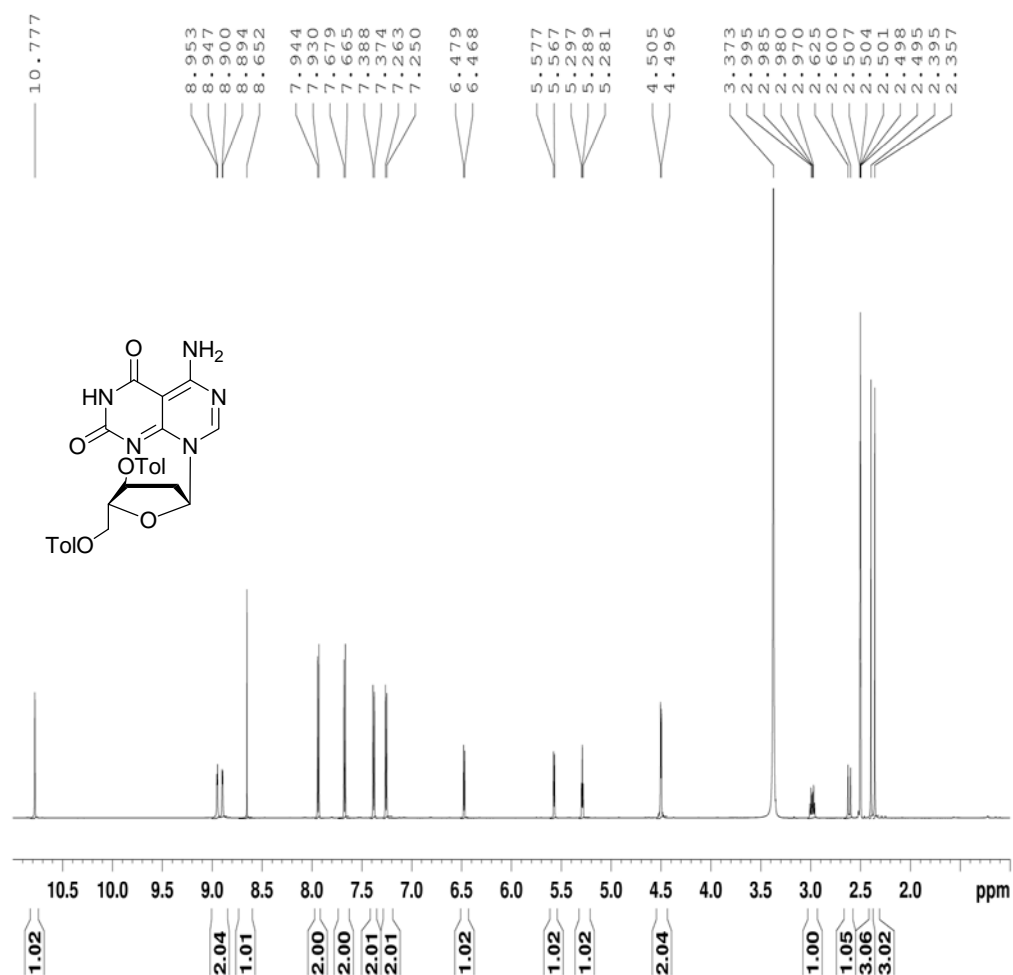

Figure S13: <sup>1</sup>H NMR spectrum of compound 6d

15

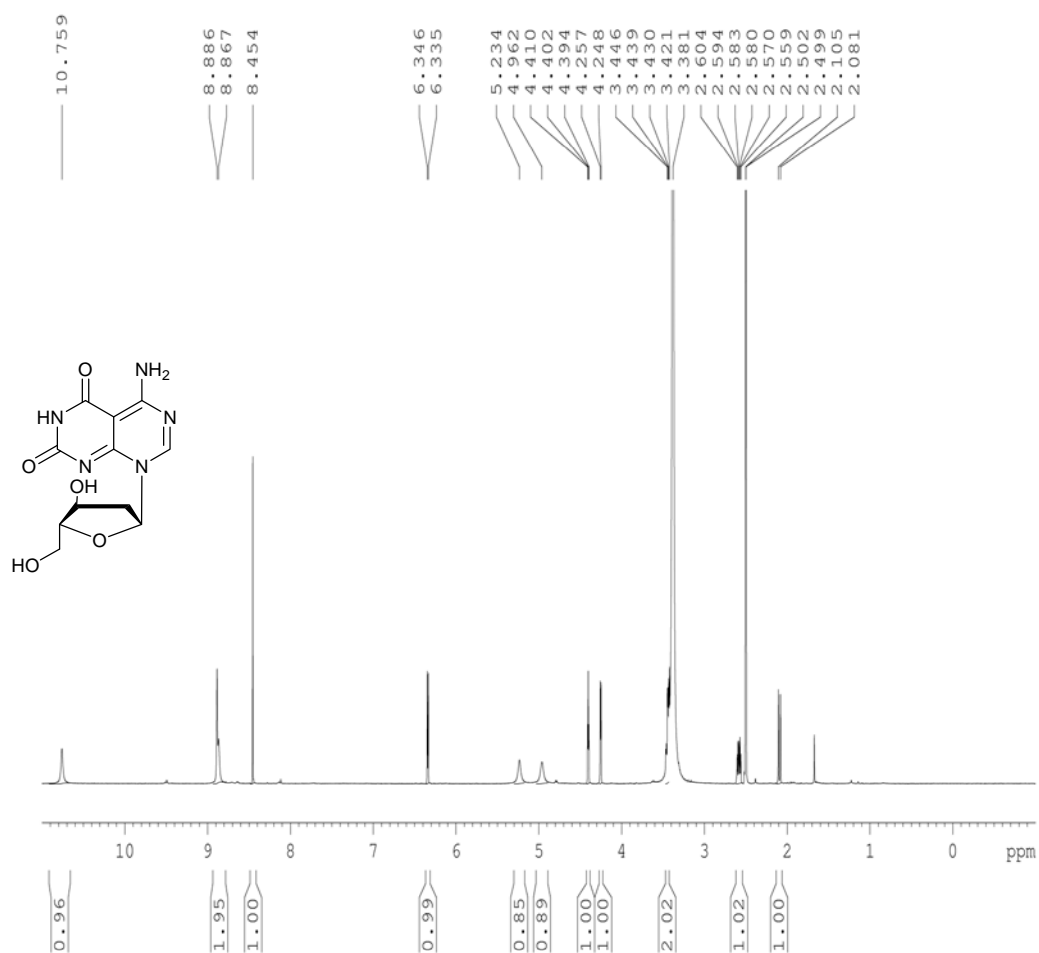

**Figure S15: <sup>1</sup>H NMR spectrum of compound 1d**

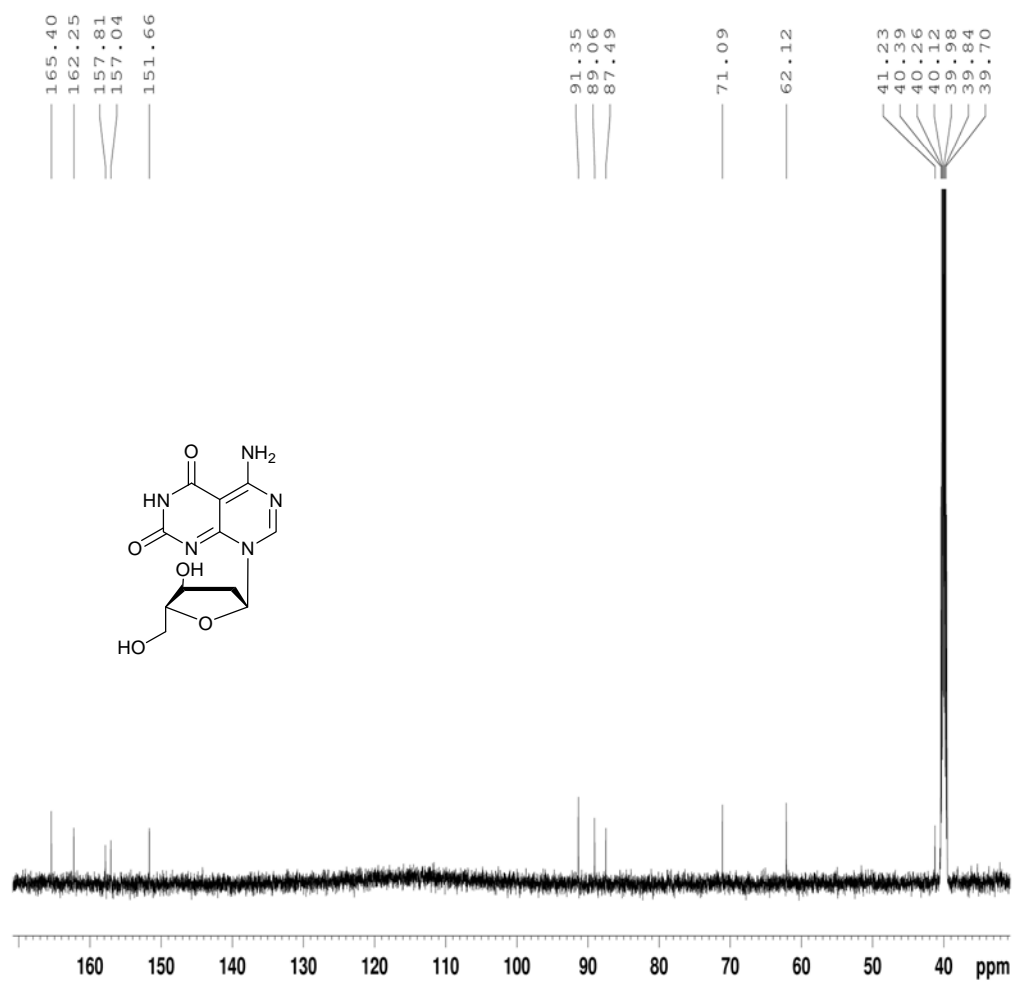

**Figure S16:** <sup>13</sup>C NMR spectrum of compound 1d

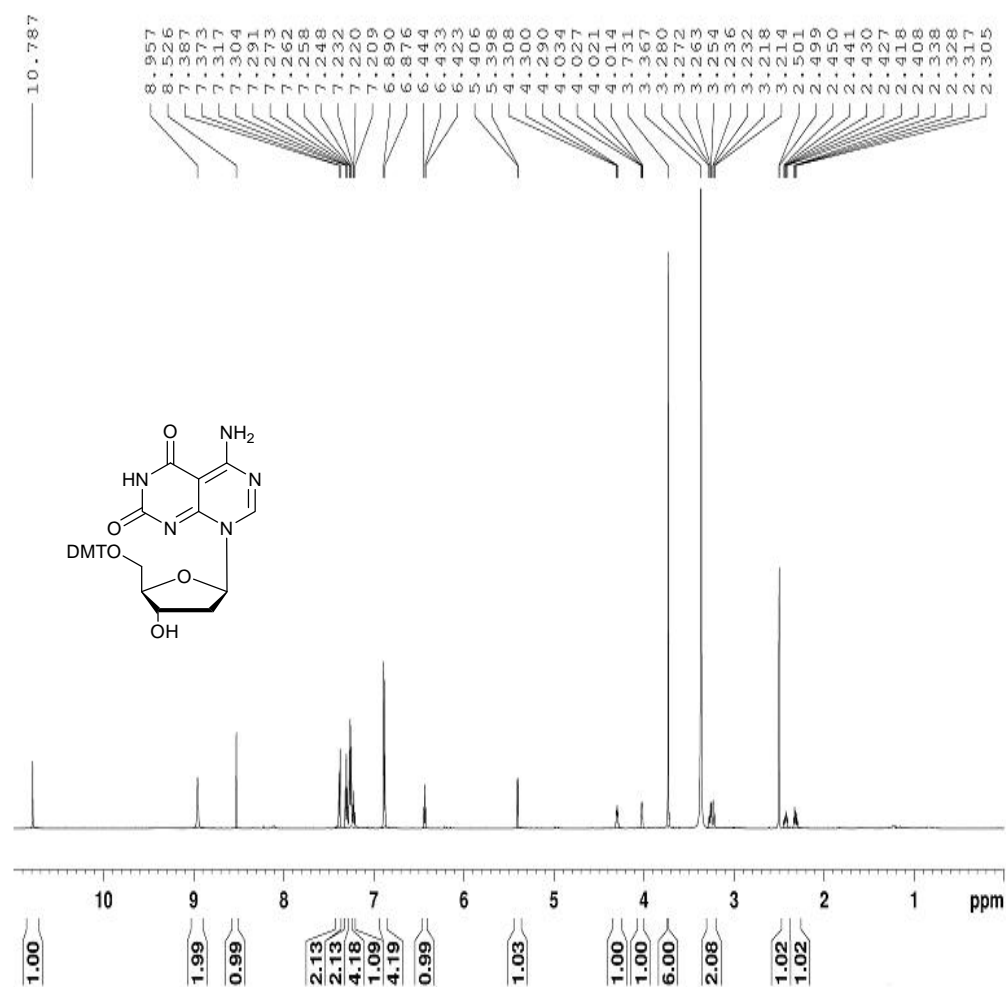

Figure S17: <sup>1</sup>H NMR spectrum of compound 7c

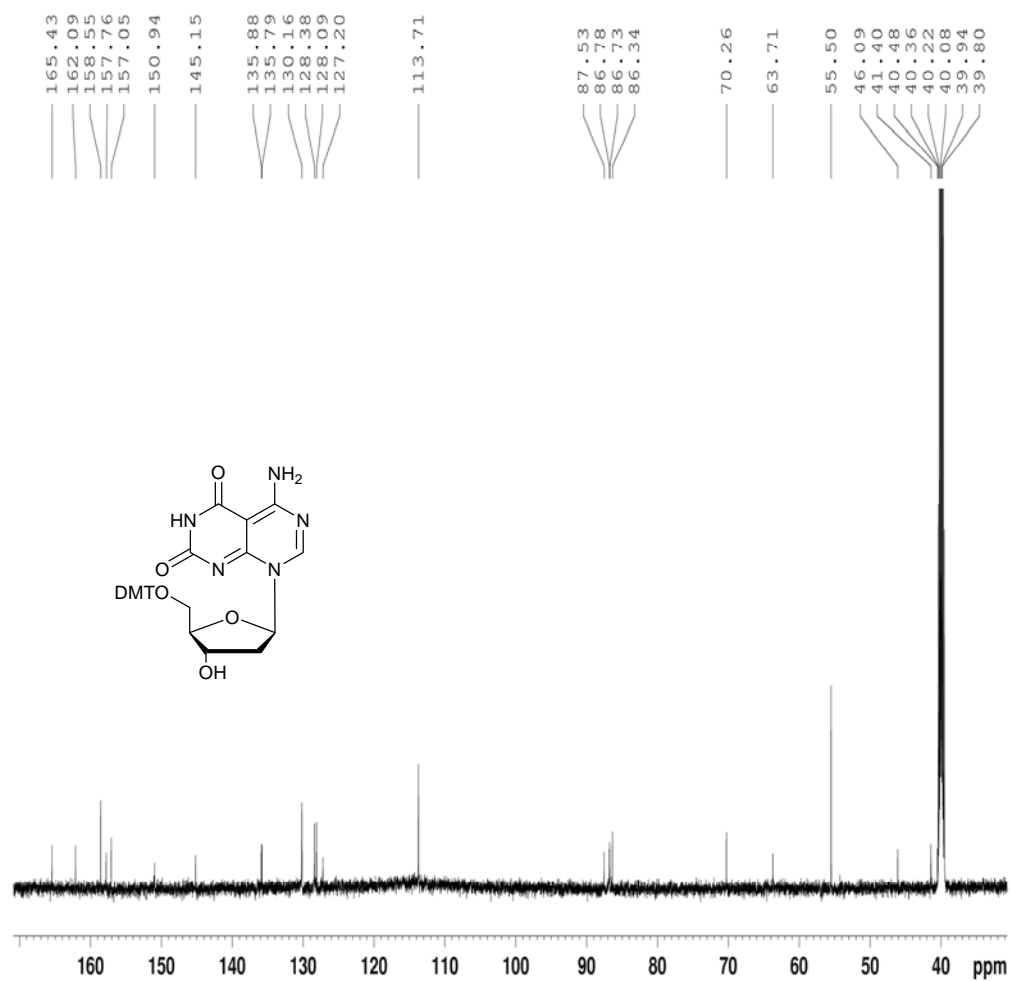

**Figure S18:** <sup>13</sup>C NMR spectrum of compound 7c

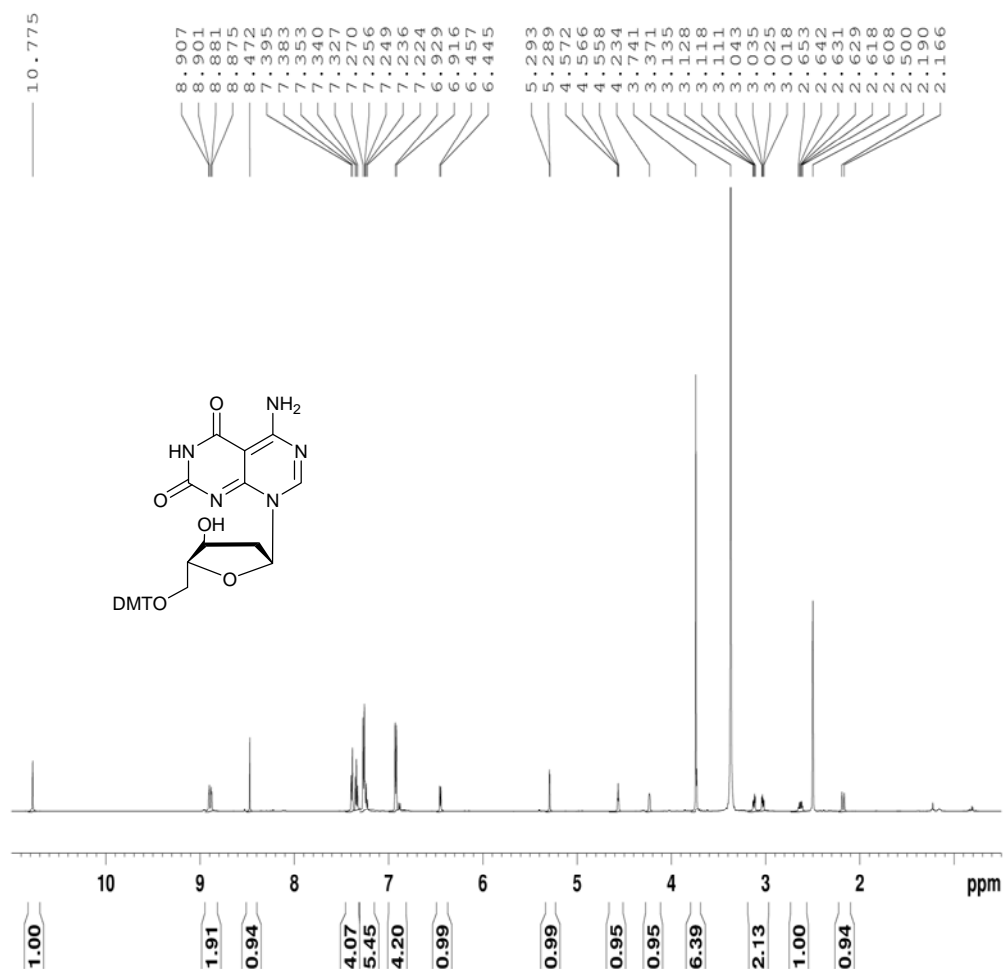

Figure S19: <sup>1</sup>H NMR spectrum of compound 7d

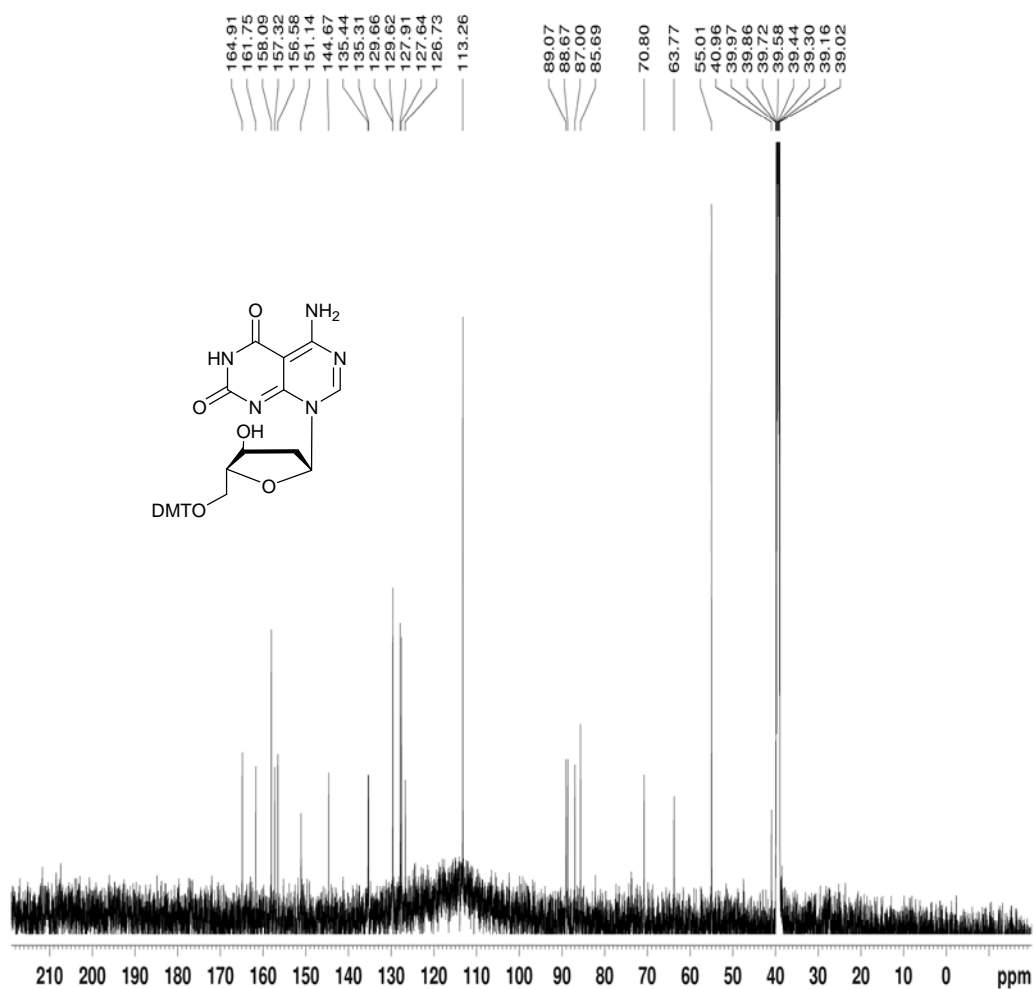

Figure S20: <sup>13</sup>C NMR spectrum of compound 7d
